# Supplementary material for: Development of a parallel sampling and analysis method for the elucidation of gas/particle partitioning of oxygenated semi-volatile organics: a limonene ozonolysis study
Source: Copernicus journal article supplement (doi:10.5194/amt-5-1459-2012), 2012-06-27
Supplement: Supplementary file 1 [file amt-5-1459-2012-supplement.pdf]

## Supplementary material

### *Chemicals list*

All chemicals were purchased from Sigma-Aldrich Co. (St. Louis, USA) with the exception of 4-oxopentanal purchased from Diverchim SA (Montataire, France). Compounds chosen as relevant compounds for atmospheric species are noted “**Generic compounds**”, compounds specifically chosen for limonene ozonolysis products identification and quantification are noted “**Limonene application**”, compounds used as precursors for SOA generation experiments are noted “**Precursors**”.

| Compound                 | Supplier, purity    | Formula                                                                               |
|--------------------------|---------------------|---------------------------------------------------------------------------------------|
| <i>Generic compounds</i> |                     |                                                                                       |
| methacroleine            | Aldrich, 95%        | 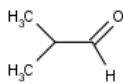  |
| butanal                  | Fluka, ≥99.0%       |  |
| pentanal                 | Aldrich, 97%        |  |
| heptanal                 | Aldrich, ≥92%       |  |
| octanal                  | Aldrich, 99%        |  |
| nonanal                  | Aldrich, ≥95%       |  |
| 2-ethylbutanal           | Aldrich, ≥92%       |  |
| 2-butenal                | Aldrich, 97%        |  |
| benzaldehyde             | Sigma-Aldrich, ≥99% |  |

| Compound                             | Supplier, purity                                | Formula                                                                               |
|--------------------------------------|-------------------------------------------------|---------------------------------------------------------------------------------------|
| <i>Generic compounds (continued)</i> |                                                 |                                                                                       |
| citronellal                          | Aldrich, $\geq 95\%$                            | 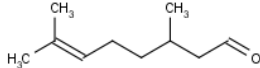   |
| citral                               | Aldrich, 95%                                    |    |
| ethyl-3-methyl-4-oxocrotonate        | Aldrich, $\geq 97\%$                            |    |
| glyoxal                              | Sigma-Aldrich, 40 wt. % in H <sub>2</sub> O     |    |
| glutaraldehyde                       | Sigma-Aldrich, grade I, 70% in H <sub>2</sub> O |    |
| 3-penten-2-one                       | Aldrich, 70%                                    |   |
| 2-hexanone                           | Fluka, $\geq 99.5\%$                            |  |
| 4-heptanone                          | Aldrich, 98%                                    |  |
| dimethylglyoxal                      | Fluka, $\geq 99.0\%$                            |  |
| 3-methyl-2,4-pentanedione            | Aldrich, 85%                                    |  |
| methylglyoxal                        | Fluka, $\sim 40\%$ in H <sub>2</sub> O          |  |
| crotyl alcohol                       | Aldrich, 96%                                    |  |
| 1-butanol                            | Riedel-de-Haën, $\geq 99.8\%$                   |  |
| 3-hexanol                            | Aldrich, $\geq 97\%$                            |  |

| Compound                             | Supplier, purity                | Formula                                                                               |
|--------------------------------------|---------------------------------|---------------------------------------------------------------------------------------|
| <i>Generic compounds (continued)</i> |                                 |                                                                                       |
| 1-nonanol                            | Aldrich, 98%                    | 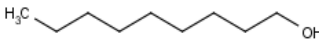   |
| farnesol                             | Aldrich, 95%                    |    |
| phenol                               | Sigma-Aldrich, ≥99%             |    |
| 4-methoxyphenol                      | Aldrich, 99%                    |    |
| <i>t</i> -butyl-4-hydroxybutyrate    | Aldrich, <sup>CPR</sup> product |    |
| (S)-3-butene-1,2-diol                | Aldrich, ≥97.0%                 |  |
| diethyleneglycol                     | Sigma-Aldrich, ≥99.0%           |  |
| tetraethyleneglycol                  | Aldrich, 99%                    |  |
| propionic acid                       | Fluka, ≥98%                     |  |
| crotonic acid                        | Aldrich, 98%                    |  |
| methacrylic acid                     | Aldrich, 99%                    |  |
| valeric acid                         | Aldrich, ≥99%                   |  |
| 2-ethylbutyric acid                  | Aldrich, 99%                    |  |
| heptanoic acid                       | Aldrich, 96%                    |  |

| Compound                             | Supplier, purity                | Formula                                                                               |
|--------------------------------------|---------------------------------|---------------------------------------------------------------------------------------|
| <i>Generic compounds (continued)</i> |                                 |                                                                                       |
| benzoic acid                         | Sigma-Aldrich, $\geq 99.5\%$    | 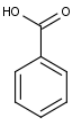   |
| monomethylfumarate                   | Aldrich, 97%                    |    |
| oxalic acid                          | Sigma-Aldrich, $\geq 99.0\%$    |    |
| succinic acid                        | Sigma-Aldrich, $\geq 99.0\%$    |    |
| 3-ethyl-3-methylglutaric acid        | Aldrich, 97%                    |    |
| 2,2-dimethyl-3-hydroxypropionic acid | Aldrich, <sup>CPR</sup> product |   |
| 8-hydroxyoctanoic acid               | Aldrich, $\geq 98.5\%$          |  |
| caffeic acid                         | Sigma, $\geq 98.0\%$            |  |
| hydroxyacetone                       | Aldrich, 90%                    |  |
| pyruvic acid                         | Aldrich, 98%                    |  |
| 3-hydroxy-3-methyl-2-butanone        | Aldrich, 95%                    |  |
| 2-hydroxycyclohexanone               | Aldrich, <sup>CPR</sup> product |  |

| Compound                           | Supplier, purity             | Formula                                                                               |
|------------------------------------|------------------------------|---------------------------------------------------------------------------------------|
| <b><i>Limonene application</i></b> |                              |                                                                                       |
| perillaldehyde                     | Aldrich, 92%                 | 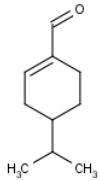   |
| (+)-dihydrocarvone                 | Aldrich, 98%                 |    |
| (+)-carvone                        | Fluka, 98.5%                 |    |
| (1S,2S,4R)-(+)-limonene-1,2-diol   | Aldrich, ≥97.0%              |   |
| perillic acid                      | Aldrich, 95%                 |  |
| pinic acid                         | Aldrich                      |  |
| 3-carboxyhexanedioic acid          | Aldrich                      |  |
| D-malic acid                       | Supelco, analytical standard |  |
| levulinic acid                     | Aldrich, 98%                 |  |
| 6-oxoheptanoic acid                | Aldrich, 90%                 |  |

| Compound                                | Supplier, purity | Formula                                                                               |
|-----------------------------------------|------------------|---------------------------------------------------------------------------------------|
| <i>Limonene application (continued)</i> |                  |                                                                                       |
| cis-pinonic acid                        | Aldrich, 98%     | 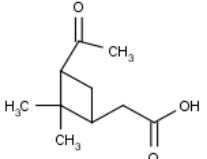   |
| alpha-ketoglutaric acid                 | Fluka, ≥99.0%    |    |
| 4-oxoheptanedioic acid                  | Aldrich, 98%     |    |
| 4-oxopentanal                           | Diverchim, > 90% |    |
| <i>SOA precursors</i>                   |                  |                                                                                       |
| (R)-(+)-limonene                        | Fluka, ≥99.0%    |   |
| isoprene                                | Aldrich, 99%     |  |
